# Supplementary material for: Implementing person-centred outcome measures in palliative care: An exploratory qualitative study using Normalisation Process Theory to understand processes and context
Source: PubMed Central journal article supplement — Palliat Med. 2020 Nov 29;35(2):397–407. doi: 10.1177/0269216320972049 (PMC7897789; doi:10.1177/0269216320972049), 2020-11-29
Supplement: sj-pdf-1-pmj-10.1177_0269216320972049.pdf [file sj-pdf-1-pmj-10.1177_0269216320972049.pdf]

## RESOLVE INTERVIEW GUIDE

### Introduction

Explain the research: That is, we are interested in your experiences whilst using outcome measures in routine palliative care practice with a view to creating support/training packages to assist with their implementation.

*Icebreaker:* Recap demographic information sheet with participant.

### General views and experiences of outcome measures

- 1) To start, it would be useful to discuss what outcome measures mean to you within palliative care?
- 2) What do you think about using outcome measures in palliative care?
  - Can you tell me more about why you feel this way?
- 3) Can you talk to me about how you use outcome measures at work?

| Yes                                                                                                                                                                                                                                                                                                                                                                                                                                                                                                                                                                                                                                                                                   | No                                                                                                 |
|---------------------------------------------------------------------------------------------------------------------------------------------------------------------------------------------------------------------------------------------------------------------------------------------------------------------------------------------------------------------------------------------------------------------------------------------------------------------------------------------------------------------------------------------------------------------------------------------------------------------------------------------------------------------------------------|----------------------------------------------------------------------------------------------------|
| <ul style="list-style-type: none"> <li>• What outcome measures do you use?</li> <li>• How often do you use them?</li> <li>• How did you get started using outcome measures here at the hospice?</li> <li>• If any, what training and/or experience have you had in the use of outcome measures?               <ul style="list-style-type: none"> <li>○ Courses                   <ul style="list-style-type: none"> <li>• Which ones and where did you access them?</li> </ul> </li> <li>○ Training at the hospice                   <ul style="list-style-type: none"> <li>• Who undertook the training for you?</li> <li>• How long did it take?</li> </ul> </li> </ul> </li> </ul> | <ul style="list-style-type: none"> <li>• Why not?</li> <li>• Have you used them before?</li> </ul> |

|                                                                                                                                                                                         |  |
|-----------------------------------------------------------------------------------------------------------------------------------------------------------------------------------------|--|
| <ul style="list-style-type: none"> <li>• Was it just at induction or who helps you with ongoing updates?</li> <li>• Shared knowledge (e.g., from co-workers, or during MDTs)</li> </ul> |  |
|-----------------------------------------------------------------------------------------------------------------------------------------------------------------------------------------|--|

**Use of outcome measures**

***Collection/recording***

| Yes                                                                                                                                                                                                                                                                                                                                                                                                                                                                                                                                                                                                                                                                                                                                                               | No                                                                                                                                                                                                                                                                                                                                                                                                                                                                                                                                                                                                                                                                                                                                                                                   |
|-------------------------------------------------------------------------------------------------------------------------------------------------------------------------------------------------------------------------------------------------------------------------------------------------------------------------------------------------------------------------------------------------------------------------------------------------------------------------------------------------------------------------------------------------------------------------------------------------------------------------------------------------------------------------------------------------------------------------------------------------------------------|--------------------------------------------------------------------------------------------------------------------------------------------------------------------------------------------------------------------------------------------------------------------------------------------------------------------------------------------------------------------------------------------------------------------------------------------------------------------------------------------------------------------------------------------------------------------------------------------------------------------------------------------------------------------------------------------------------------------------------------------------------------------------------------|
| <ul style="list-style-type: none"> <li>• Can you talk me through the process of how you collect outcomes data during practice?</li> <li>• How do you find this process? <ul style="list-style-type: none"> <li>• Do you feel as though you've experienced any challenges to collecting outcomes data?</li> <li>• Why do you feel this? Can you give me examples?</li> <li>• What do you think needs to be in place to address these challenges?</li> </ul> </li> <li>• Does the team and setting that you work in influence your use of outcome measures?</li> <li>• Are there any beliefs or attitudes among your team that has supported your use of outcome measures? <ul style="list-style-type: none"> <li>○ How; probe for examples?</li> </ul> </li> </ul> | <ul style="list-style-type: none"> <li>• What patient information do you collect? <ul style="list-style-type: none"> <li>○ How do you collect it?</li> </ul> </li> <li>• In your role [name role], have you experienced any challenges to collecting outcome measures in practice are? <ul style="list-style-type: none"> <li>• Why do you feel this? Can you give me examples?</li> <li>• What do you think needs to be in place to address these challenges?</li> </ul> </li> <li>• Do you think that you could use outcome measures in the team and setting that you work?</li> <li>• Are there any beliefs or attitudes among your team that has hindered your use of outcome measures? <ul style="list-style-type: none"> <li>○ How; probe for examples?</li> </ul> </li> </ul> |

***Transfer (e.g., getting them onto a system)***

| Yes                                                                                                                                                                                                                  | No                                                                                                                                              |
|----------------------------------------------------------------------------------------------------------------------------------------------------------------------------------------------------------------------|-------------------------------------------------------------------------------------------------------------------------------------------------|
| <ul style="list-style-type: none"> <li>• Do you know what systems you use to store outcomes data? <ul style="list-style-type: none"> <li>○ What's the process of transferring data onto these</li> </ul> </li> </ul> | <ul style="list-style-type: none"> <li>• Why? <ul style="list-style-type: none"> <li>○ What are the challenges you face?</li> </ul> </li> </ul> |

|                                                                                                                                                                                                                                                                                                                                                                                                                                                          |                                                                                                                                                                                                                                                         |
|----------------------------------------------------------------------------------------------------------------------------------------------------------------------------------------------------------------------------------------------------------------------------------------------------------------------------------------------------------------------------------------------------------------------------------------------------------|---------------------------------------------------------------------------------------------------------------------------------------------------------------------------------------------------------------------------------------------------------|
| <p>systems?</p> <ul style="list-style-type: none"> <li>○ What are your views on this process?</li> </ul> <ul style="list-style-type: none"> <li>● Are you able to collate and extract data in your current role? <ul style="list-style-type: none"> <li>○ If so, how? And how do you use this collated data?</li> <li>○ If not, why (i.e., what are the challenges to this)?</li> <li>○ What support is needed to help with this?</li> </ul> </li> </ul> | <ul style="list-style-type: none"> <li>○ What do you feel needs to be in place to address these challenges?</li> </ul> <ul style="list-style-type: none"> <li>● If you were to use outcome measures, what systems would need to be in place?</li> </ul> |
|----------------------------------------------------------------------------------------------------------------------------------------------------------------------------------------------------------------------------------------------------------------------------------------------------------------------------------------------------------------------------------------------------------------------------------------------------------|---------------------------------------------------------------------------------------------------------------------------------------------------------------------------------------------------------------------------------------------------------|

**Feedback (to patients and also at a service level)**

| Yes                                                                                                                                                                                                                                                                                                                                                                                                                                                                                                                                                                                                                                                         | No |
|-------------------------------------------------------------------------------------------------------------------------------------------------------------------------------------------------------------------------------------------------------------------------------------------------------------------------------------------------------------------------------------------------------------------------------------------------------------------------------------------------------------------------------------------------------------------------------------------------------------------------------------------------------------|----|
| <ul style="list-style-type: none"> <li>● Is using outcomes data useful?</li> <li>● How do you use outcomes data in guiding care? <ul style="list-style-type: none"> <li>○ At the patient level (e.g., caring for/addressing needs of individual patients)?</li> <li>○ At the service level (e.g., collating patient data to evaluate services)?</li> </ul> </li> <li>● Are there challenges that you have experienced in using outcomes data? <ul style="list-style-type: none"> <li>○ With patients?</li> <li>○ Within teams (e.g., during MDTs)</li> </ul> </li> <li>● Would you like to shape or use the Outcome Measures in a different way?</li> </ul> |    |

**Training Needs**

What training do you feel would be helpful in assisting with the routine collection, transfer and feedback of outcomes data?

- In what form would training needs be best addressed? (e.g., computer learning, paper-based, training session?)

Do you think that any alternations need to be made in order for outcome measures to be more meaningful/improve practice?

What do you feel would be needed to sustain the implementation and use of outcomes data in the long term in your workplace?

**Thank for their participation and ask if they have any questions.**
